## **Transcranial Electrical Stimulation Motor Threshold Combined with Reverse-Calculated Electric Field Modeling Can Determine Individualized tDCS Dosage**

Kevin A. Caulfield<sup>1</sup>, Bashar W. Badran<sup>1</sup>, William H. DeVries<sup>1</sup>, Philipp M. Summers<sup>1</sup>, Emma Kofmehl<sup>1</sup>, Xingbao Li<sup>1</sup>, Jeffrey J. Borckardt<sup>1</sup>, Marom Bikson<sup>2</sup>, Mark S. George<sup>1,3</sup>

<sup>1</sup>Brain Stimulation Laboratory, Department of Psychiatry, Medical University of South Carolina, Charleston, SC, USA

<sup>2</sup>Department of Biomedical Engineering, The City College of New York, NY, USA

<sup>3</sup>Ralph H. Johnson VA Medical Center, Charleston, SC, USA

Corresponding Author:

Kevin A. Caulfield  
Medical University of South Carolina  
Department of Psychiatry  
Brain Stimulation Division  
67 President St., 502N  
Charleston, SC 29425  
(P) 843-792-1006  
(F) 843-792-5702  
(E) caulfiel@musc.edu

## tDCS Dosing

### Abstract

**Background:** Unique amongst brain stimulation tools, transcranial direct current stimulation (tDCS) currently lacks an easy method for individualizing dosage.

**Objective:** Can one individually dose tDCS? We developed a novel method of reverse-calculating electric-field (E-field) models based on Magnetic Resonance Imaging (MRI) scans that can determine individualized tDCS dose. We also sought to develop an MRI-free method of individualizing tDCS dose by measuring transcranial magnetic stimulation (TMS) motor threshold (MT) and single pulse, suprathreshold transcranial electrical stimulation (TES) MT and regressing it against E-field modeling.

**Methods:** In 29 healthy adults, we acquired TMS MT, TES MT, and structural MRI scans with a fiducial marking the motor hotspot. We then computed a “reverse-calculated tDCS dose” of tDCS applied at the scalp needed to cause a 1.00V/m E-field at the cortex. Finally, we examined whether the predicted E-field values correlated with each participant’s measured TMS MT or TES MT.

**Results:** We were able to determine a reverse-calculated tDCS dose for each participant. The Transcranial **Electrical** Stimulation MT, but not the Transcranial **Magnetic** Stimulation MT, significantly correlated with the calculated tDCS dose determined by E-field modeling ( $R^2 = 0.509$ ,  $p < 0.001$ ).

**Conclusions:** Reverse-calculation E-field modeling, alone or in combination with TES MT, shows promise as a method to individualize tDCS dose. The large range of the reverse-calculated tDCS doses between subjects underscores the likely need to individualize tDCS dose. If these results are confirmed in future studies, TES MT may evolve into an inexpensive and quick method to individualize tDCS dose.

## tDCS Dosing

### 1 **Introduction**

2 Transcranial direct current stimulation (tDCS) is an appealing brain stimulation method  
3 due to its efficacy in treating multiple neurological and psychiatric conditions(1-4), relatively  
4 cheap cost(5, 6), excellent safety profile(7), and ease of use that could lead to self-  
5 administration(7-9). However, tDCS currently does not have a method or biomarker to confirm  
6 that stimulation is reaching the cortex or to individualize dose. A typical tDCS study applies a  
7 weak uniform electrical current (typically 1-2mA for 20 minutes)(10), often paired with a  
8 behavioral task, that may underdose some individuals and be a cause of mixed findings in the  
9 field(11-21). Determining a method of individualizing tDCS dosage is important as it would likely  
10 inform the experimental design and interpretation of tDCS studies, probably improve the effect  
11 size, and allow for more rigorous clinical and investigational use.

12 Very few studies have examined if there is a way to individualize tDCS dosage. One  
13 potential method could be to use electric-field (E-field) modeling combined with a  
14 neurophysiological measurement such as transcranial magnetic stimulation (TMS) motor  
15 threshold (MT)(22). Researchers have shown that TMS MT correlates with the E-field produced  
16 by 1mA of tDCS(22). However, no study has yet explored how to use E-field modeling and a  
17 neurophysiological measurement to prospectively individualize tDCS dosage; studies to date  
18 have used retrospective tDCS E-field modeling or for only a uniform dose such as 1mA.

19 To prospectively individualize tDCS dosage using E-field modeling, a first step is to  
20 decide upon a desired E-field threshold at the cortex. Currently, there is no consensus about the  
21 amount of stimulation it would take to excite cortical tissue using tDCS, likely owing to different  
22 neuronal cell types firing at varying thresholds and difficulty with assessing such a threshold in  
23 vivo(23). A controversial study by Vöröslakos and colleagues (2018) used implanted electrodes  
24 in human cadavers and anesthetized rats to measure the intracortical E-fields produced by  
25 tDCS from electrodes on the scalp(24). While many tDCS researchers disagree with the  
26 conclusions of the study, Vöröslakos and colleagues determined that an E-field of at least

## tDCS Dosing

27 1mV/mm (equivalent to 1V/m) at the cortex is required to affect neuronal spiking and  
28 subthreshold currents; they further estimate that it would likely take 4-6mA of tDCS current to  
29 produce E-fields of the 1mV/mm magnitude(24). In this study, we chose to use the 1V/m  
30 threshold that was informed by Vöröslakos et al.'s study. An additional benefit of using 1V/m is  
31 that it is easily scalable to the desired E-field by multiplication or division. For example, if 0.5V/m  
32 is the desired threshold to individualize tDCS dosage to, the calculated tDCS dose to produce  
33 1V/m would be halved.

34 We aimed to develop a novel method of using E-field modeling to determine an  
35 individualized, "reverse-calculated tDCS dose" to produce an E-field threshold of 1.00V/m that  
36 could easily be scaled up or down. We correlated the theoretical reverse-calculated tDCS dose  
37 with acquired values of TMS MT and transcranial electrical stimulation (TES) MT to determine if  
38 a neurophysiological measure could be used to predict individualized reverse-calculated tDCS  
39 dose. We hypothesized that TMS MT or TES MT would correlate with reverse-calculated tDCS  
40 dose for a 1.00V/m E-field and could be used in the future to individually titrate tDCS dosage to  
41 any desired threshold.

## tDCS Dosing

## 42 **Materials and Methods**

### 43 Study Overview

44 We enrolled 30 healthy participants (15 women, mean age = 26.9, SD = 9.1) in this two  
45 visit IRB-approved study. One participant dropped out prior to receiving the MRI scan, so our  
46 final sample size was 29. Each participant gave written, informed consent before starting the  
47 experimental protocol. In Visit 1, we acquired a resting TMS MT for each participant by  
48 stimulating the left motor cortex and recording motor evoked potentials (MEPs) in a standard,  
49 closed-loop TMS MT acquisition protocol. We used three electrodes on the contralateral right  
50 hand, combined with Spike2 software, to record MEPs. We defined an MEP as having a peak-  
51 to-peak amplitude greater or equal to 0.05mV. Parametric Estimation via Sequential Testing  
52 (PEST) software was used to help optimally determine the TMS MT in as few pulses as  
53 possible(25).

54 Following TMS MT acquisition, we then acquired an active TES MT for each participant  
55 by placing an anodal tab electrode (Natus Neurology, Inc., Pleasanton, CA, USA; rectangular  
56 with dimensions of 35 x 20mm) over the TMS motor hotspot and a cathodal ground plate  
57 electrode (Natus Neurology, Inc., Pleasanton, CA, USA; rectangular with area = 55 x 42mm)  
58 over the left deltoid (**See Figure 1, Supplemental Material S1, and Supplemental Video for a**  
59 **detailed description of the TES procedure**). Briefly, participants were instructed to make a  
60 “thumbs-up” sign with their contralateral right hands to active the motor circuit, which Merton  
61 and colleagues (1982) had previously shown lowers the TES MT by approximately 20%(26).  
62 Single, suprathreshold TES pulses were delivered using a constant current stimulator (Digitimer  
63 DS7A, Letchworth Garden City, England, UK). With a pulse width of 200µs, a maximum voltage  
64 of 400V, monophasic waveform, and an initial stimulation intensity of 58.0mA, we used a  
65 modified PEST program to determine the TES MT using only 5 pulses and were able to acquire  
66 a relatively painless TES MT for each participant (**See Supplemental Material S2 for painfulness**  
67 **and tolerability ratings**).

## tDCS Dosing

68 In Visit 2, each participant underwent a structural magnetic resonance imaging (MRI)  
69 scan. A vitamin E capsule was used as a fiducial to mark each participant's previously  
70 determined scalp target for the TMS/TES MT. This allowed the motor hotspot location to later be  
71 visualized in MRICro.

### 72 Preparing MRI Scans for E-Field Modeling

73 We used the MRICro program to visualize the fiducial marking the left hemispheric motor  
74 hotspot location and noted the X, Y, and Z coordinates for the fiducial location (**See Figure 2**).  
75 In addition, we approximated the cathodal electrode location over the left deltoid by finding the  
76 lowest location on the left shoulder visible on the MRI scan (**See Figure 1**). For our E-field  
77 modeling, we used "Realistic vOlumetric-Approach to Simulate Transcranial Electric  
78 Stimulation" (ROAST)" software(27), which allowed us to use the individualized electrode  
79 placements, sizes, and orientations used to determine TES MT.

### 80 Prospective ROAST E-Field Modeling

81 Most tDCS E-field modeling studies use modeling to determine the E-field produced by a  
82 uniform tDCS current placed on the scalp (e.g. What is the E-field produced by 2mA of  
83 stimulation?). In this study, we had the opposite question: To produce an E-field of a 1.00V/m at  
84 a certain spot in the cortex, what would be the individualized, reverse-calculated tDCS dose for  
85 the electrode on the scalp?

86 We used ROAST V2.7 for our tDCS E-field modeling as it allowed us to customize the  
87 electrode sizes and locations for each participant based on their structural MRI scans(27). We  
88 customized the TES pad electrode sizes (Anode: 35mm x 20mm x 3mm; Cathode: 55mm x  
89 42mm x 3mm), locations (left motor hotspot, left deltoid), and orientations (anterior-to-posterior)  
90 to reproduce the TES montage in the ROAST code using MATLAB R2015a.

### 91 ROAST E-Field Modeling Methodology- Within Individual Analysis

92 We sought to determine the reverse-calculated tDCS dose that would be necessary to  
93 cause a 1.00V/m E-field at the cortex in each individual by reverse-calculating the ROAST

## tDCS Dosing

94 model by computing four E-field models per participant. Using the exact electrode locations  
95 used to acquire TES MT, we modeled the E-fields produced from tDCS currents of: 1mA, 3mA,  
96 5mA, and 7mA. We plotted these E-field estimates (in V/m) along the X-axis against the tDCS  
97 current input on the Y-axis. We also included the point of 0mA input producing a 0V/m E-field for  
98 a total of 5 points in the linear regression.

99 To determine the E-field produced in each model, we measured the E-field at the voxel  
100 directly underneath the center of the anodal electrode that was placed over the left motor  
101 hotspot. We calculated a linear regression for this intra-individual model and solved the linear  
102 equation for the “reverse-calculated tDCS dose” that would produce exactly a 1.00V/m E-field  
103 for that subject at that location. We then computed a fifth ROAST model at this reverse-  
104 calculated tDCS dose to confirm that the stimulation input produced the 1.00V/m E-field, and  
105 accepted values with a range of 0.99-1.01V/m. All reverse-calculated models produced an E-  
106 field value in this range.

107 Our reverse computation may seem overly elaborate, as theoretically, the electric field is  
108 linear with applied current. You should be able to run the model (for a given montage and head)  
109 for any current (say 1mA). With multiplication (e.g. no regression) you could then scale the  
110 current to produce any desired electric field. This ‘shortcut’ may prove true for future work, and  
111 general values. However, the reverse-calculated dose that emerges from the individualized  
112 linear model by putting in different current amplitudes is not exactly linear, and we sought in this  
113 paper to rigorously test for these assumptions. In the future researchers and clinicians might be  
114 able to use one model and scale this up or down as a method of reverse-calculating tDCS dose  
115 *ROAST E-Field Modeling x TMS MT and TES MT Methodology- Group Level Analyses*

116 Following E-field modeling, we plotted each individual’s reverse-calculated tDCS dose  
117 against their measured TMS MT and used a group level linear regression to determine the  
118 relationship between TMS MT and reverse-calculated tDCS dose (**Figure 3**). We used this  
119 same method to then assess the relationship between TES MT and the reverse-calculated

## tDCS Dosing

- 120 tDCS dose in a group level E-Field Model x TES MT regression (**Figures 4**). All statistical  
121 analyses were conducted in SPSS 25.0 (Armonk, NY: IBM Corp).

## tDCS Dosing

### 122 **Results**

#### 123 TMS and TES Motor Threshold (MT) Descriptive Statistics

124 The mean TMS MT was 40.19% of machine output (SD = 12.7%, range = 20-67.3%).

125 The mean TES MT was 61.35mA (SD = 14.91mA, range = 37.1-82.35mA).

#### 126 Reverse-calculated tDCS Dose: Actual Electrode Placement and Sizes

127 The mean reverse-calculated tDCS dose to produce a 1.00V/m E-field in the motor  
128 cortex using actual electrode placements was 6.38mA (SD = 1.34mA, range = 3.86 to  
129 10.21mA).

#### 130 TMS MT x Reverse-calculated tDCS Dose Linear Regression

131 This linear regression evaluated the relationship between TMS MT and reverse-  
132 calculated tDCS dose determined from the same electrode placement and sizes used for  
133 acquiring the TES MT (mean reverse-calculated tDCS dose = 6.38mA, SD = 1.34mA, range =  
134 3.86 to 10.21mA). TMS MT did not statistically predict tDCS dose variance,  $F(1,27) = 0.813$ ,  $R^2$   
135 = 0.029,  $p = 0.375$  (**See Figure 3**).

#### 136 TES MT x Reverse-calculated tDCS Dose Linear Regression

138 This regression model used the same electrode placement and sizes used to determine  
139 the TES MT that were previously used in the TMS MT regression in **Figure 3** (mean reverse-  
140 calculated tDCS dose = 6.38mA, SD = 1.34mA, range = 3.86 to 10.21mA). In this regression,  
141 TES MT significantly predicted 50.9% of the reverse-calculated tDCS dose variance to produce  
142 a 1.00V/m E-field,  $F(1,27) = 27.985$ ,  $R^2 = 0.509$ ,  $p < 0.001$  (**See Figure 4**).

143 The equation for the linear regression is: **Reverse-calculated tDCS Dose = 0.0643 \***  
144 **TES MT + 2.4319**. Thus, measuring a new TES MT and plugging the value into the formula  
145 above would allow one to prospectively determine an individual's reverse-calculated tDCS dose.  
146 For example, if an individual had a TES MT of 60mA, the reverse-calculated tDCS dose to  
147 produce a 1.00V/m E-field at their motor cortex would be 6.29mA. Notably, this reverse-

## tDCS Dosing

148 calculated tDCS dose for a 1.00V/m E-field at the cortex is easily scalable. For example, the  
149 reverse-calculated tDCS dose for a 0.50V/m E-field in the same individual would be:  $6.29\text{mA} \times$   
150  $0.5 = 3.145\text{mA}$ .

### 151 TMS MT x TES MT Linear Regression

152 We examined the relationship between TMS MT and TES MT by comparing the  
153 measured values for each individual in a linear regression. These values did not significantly  
154 correlate,  $F(1,27) = 2.95$ ,  $R^2 = 0.099$ ,  $p = 0.097$ .

## tDCS Dosing

### 155 **Discussion**

156 We conducted a study in 29 healthy individuals in which we used both TMS and TES  
157 motor thresholds (MT), combined with anatomical neuroimaging and E-field modelling to  
158 determine an individualized dosing paradigm for tDCS. This E-field modeling paradigm, was  
159 used to determine an individual's reverse-calculated tDCS dose to produce an E-field of  
160 1.00V/m. We found that an individual's transcranial **electrical** stimulation (TES) MT predicted  
161 the reverse-calculated tDCS dose needed to produce a 1.00V/m E-field at the cortex. A linear  
162 regression model using the same electrode sizes and positions as our TES MT acquisition  
163 predicted 50.9% of the reverse-calculated tDCS dose variance across our sample.

164 In contrast, a person's transcranial **magnetic** stimulation (TMS) MT did not correlate  
165 with the reverse-calculated tDCS dose to produce a 1.00V/m E-field at the cortex. It is unclear  
166 why TES MT but not TMS MT correlates with the modelled tDCS dose, but it is likely that the  
167 tDCS modeling better captures electrical energy current than that produced by TMS due to  
168 differing mechanisms. Our finding that TMS MT did not correlate with TES MT corroborates the  
169 idea that TMS MT may not predict reverse-calculated tDCS dose due to a different mechanism  
170 (electromagnetic rather than electrical stimulation).

171 This study suggests several points. First, it is possible to significantly predict  
172 approximately 50% of reverse-calculated tDCS dose variance across a relatively young and  
173 healthy cohort of participants by combining TES MT and ROAST E-field modeling. While we  
174 acquired and analyzed structural MRI scans for each participant in this study, in the future this  
175 regression approach could potentially allow TES MT acquisition alone to determine an  
176 individual's reverse-calculated tDCS dose. However, before this regression comparing TES MT  
177 and reverse-calculated tDCS dose can be used widely, our results need to be tested for  
178 replication and then shown to be valid in some form of a tDCS study measuring behavioral  
179 effects.

## tDCS Dosing

180           Second, the reverse-calculated tDCS dose to cause an E-field at a particular threshold  
181 at the cortex varies widely between individuals (3.86 to 10.21mA to produce a 1.00V/m E-field at  
182 the cortex). This variability in reverse-calculated tDCS dose is substantial. To illustrate the range  
183 of dosage, the individual needing the highest reverse-calculated tDCS dose (10.21mA) in our  
184 actual electrode position and size model would need a reverse-calculated tDCS dose that is  
185 265% higher than the individual who needed the lowest reverse-calculated tDCS dose  
186 (3.86mA). In addition, the inter-individual variance exists regardless of the intended threshold in  
187 any region of the brain. For example, in order to produce a 1.00V/m induced electrical field at  
188 the motor cortex, the range of tDCS dose needed was from 3.86 to 10.21 mA (average 6.38 mA  
189 tDCS dose at scalp). If we moved the entire scale average to instead average 2.0mA at the  
190 scalp, the needed individualized range remains 1.21-3.22mA across the sample. If the average  
191 dose of 2.0mA were applied uniformly (similarly to how a uniform dose is applied in every extant  
192 tDCS study), it would underdose any individual needing above 2.0mA, particularly the person  
193 requiring 3.22mA. Taken in sum, our E-field modeling corroborates the idea that individualized  
194 tDCS dose is needed for consistent dosing across individuals and studies.

195           Third, and perhaps controversially, if a 1.00V/m E-field threshold is necessary to cause a  
196 spike in neuronal firing, the results from this study support the idea that a uniform 1-2mA tDCS  
197 dose is likely insufficient to reach the cortex with a large effect in many participants. While  
198 acknowledging that there may actually be some increases in neuronal resting membrane  
199 potential at lower than 1.00V/m, our models using this threshold showed that no participant's  
200 reverse-calculated tDCS dose was below 3.86mA and the average reverse-calculated tDCS  
201 dose was 6.38mA. tDCS likely has effects at intensities below the 1.00V/m assumption we  
202 used, but depending on the reverse-calculated threshold, these results suggest that some, if not  
203 many, individuals are underdosed when uniform doses are used.

## tDCS Dosing

### 204 Limitations

205           There were several limitations of this study. Using E-field modeling, even when it has  
206 been validated using intracranial recordings, is inherently theoretical. In addition, the method of  
207 reverse-calculating tDCS dose can be further refined. While ROAST E-field modeling nicely  
208 accounts for many potential co-factors such as scalp-to-cortex distance and tissue conductivity,  
209 there may be other factors that influence response to tDCS, even if the stimulation reaches the  
210 cortex. Our regression value of  $R^2 = 0.509$  in **Figure 4** suggests that using TES MT to  
211 determine an individualized reverse-calculated tDCS dose for each participant can predict  
212 slightly more than 50% of the dose variance. This is a major step forward from accounting for  
213 0% of dose variance in all extant tDCS studies that use uniform doses of current. However, this  
214 also means that the source of approximately 50% of the dose variance remains to be  
215 determined. A future dose-response study would help to elucidate if individualized dose  
216 improves response to tDCS and what other factors may influence reverse-calculated tDCS  
217 dose. The relationship between TES MT and reverse-calculated tDCS dose might also change  
218 outside of the motor cortex or with different electrode montages (e.g. left M1-supraorbital) and  
219 are ongoing areas of research in our lab.

220           Lastly, it remains unclear what E-field magnitude to target when calculating the reverse-  
221 calculated tDCS dose. Based on the existing literature(24) and for ease of scalability to a  
222 desired E-field threshold, we reverse-calculated an individualized tDCS dose to produce a  
223 1.00V/m E-field at the cortex for each person. However, it is possible that the 1.00V/m E-field  
224 requirement for an increase in neuronal resting potential determined from rodent and human  
225 cadaver studies would not scale up to humans or may differ in live human tissue(28). In fact,  
226 many tDCS researchers disagree with this 1.00V/m E-field threshold. Thus, using the  
227 combination of TES MT and reverse-calculation E-field modeling to individually dose tDCS  
228 could potentially be even more informative as the field refines its understanding about the

## tDCS Dosing

229 minimally necessary E-field magnitude needed to excite cortical tissue, and then scaling our  
230 findings up or down to fit calculate the true reverse-calculated tDCS dosage for each person.

### 231 *Conclusions*

232           TES MT is feasible and tolerable. This value, either combined with reverse-calculated E-  
233 field modeling or stand alone, can be used to determine a theoretical reverse-calculated tDCS  
234 dose for stimulation to reach the cortex of each individual. Our statistical model comparing TES  
235 MT to reverse-calculated tDCS dose can be used to individually dose tDCS, predicting  
236 approximately 50% of the dose variance in tDCS studies. Moreover, these regressions reveal  
237 the wide range (i.e. 3.86 to 10.21mA) between participants, underscoring the need to further  
238 develop and evaluate the utility of TES MT combined with E-field modeling for dosing tDCS.

## tDCS Dosing

**Conflict of Interest Statement:** We confirm that there are no known conflicts of interest associated with this publication and there was no financial support for this work that could have influenced its outcome.

**Financial Support:** This study was funded by the National Center of Neuromodulation for Rehabilitation (NC NM4R). The National Center of Neuromodulation for Rehabilitation (NC NM4R) is supported by the Eunice Kennedy Shriver National Institute of Child Health & Human Development of the National Institutes of Health under award number P2CHD086844. This study was partially funded by grants to MB from NIH (NIH-NINDS 1R01NS101362, NIH-NIMH 1R01MH111896, NIH-NCI U54CA137788/U54CA132378, and NIH-NIMH 1R01MH109289)

## Figure Legends

**Figure 1:** TES Electrode Set-Up. **1A:** Experimental set-up with labeled devices and electrodes. **1B:** A picture of the constant current stimulator (Digitimer DS7A) used to acquire TES MT. **1C:** PEST program window showing an example in which 5 pulses of TES determined a TES MT of 50mA.

**Figure 2:** ROAST E-Field Modeling Pipeline for One Participant (1cm Diameter Circular Electrodes). **2A:** Structural MRI with an arrow pointing at the fiducial on the scalp indicating the motor hotspot coordinates (visualized in MRICroGL). **2B:** Using ROAST, an anodal electrode was placed at the left motor hotspot and the cathode was placed on the left shoulder to match the TES electrode montage. **2C:** ROAST E-field model output after skin, skull, CSF, and brain tissue segmentation. **2D/2E:** Close-up views of coronal (2D) and axial (2E) slices with arrows indicating the voxel directly underneath the center of the fiducial marking the motor hotspot. In this example, the E-field was exactly 1.00V/m at this voxel.

**Figure 3:** TMS MT Does Not Correlate with Reverse-Calculated tDCS Dose,  $F(1,27) = 0.813$ ,  $R^2 = 0.029$ ,  $p = 0.375$ .

**Figure 4:** TES MT Significantly Correlates with Reverse-Calculated tDCS Dose,  $F(1,27) = 27.985$ ,  $R^2 = 0.509$ ,  $p < 0.001$ .

## tDCS Dosing

### References

1. Meron D, Hedger N, Garner M, Baldwin DS. Transcranial direct current stimulation (tDCS) in the treatment of depression: systematic review and meta-analysis of efficacy and tolerability. *Neuroscience & Biobehavioral Reviews*. 2015;57:46-62.
2. Fröhlich F, Burrello TN, Mellin JM, Cordle AL, Lustenberger CM, Gilmore JH, et al. Exploratory study of once-daily transcranial direct current stimulation (tDCS) as a treatment for auditory hallucinations in schizophrenia. *European Psychiatry*. 2016;33:54-60.
3. Yuan T, Yadollahpour A, Salgado-Ramírez J, Robles-Camarillo D, Ortega-Palacios R. Transcranial direct current stimulation for the treatment of tinnitus: a review of clinical trials and mechanisms of action. *BMC neuroscience*. 2018;19(1):66.
4. Nitsche MA, Boggio PS, Fregni F, Pascual-Leone A. Treatment of depression with transcranial direct current stimulation (tDCS): a review. *Exp Neurol*. 2009;219(1):14-9.
5. Zaghi S, Heine N, Fregni F. Brain stimulation for the treatment of pain: A review of costs, clinical effects, and mechanisms of treatment for three different central neuromodulatory approaches. *Journal of pain management*. 2009;2(3):339-52.
6. Sauvaget A, Tostivint A, Etcheverrigaray F, Pichot A, Dert C, Schirr-Bonnais S, et al. Hospital production cost of transcranial direct current stimulation (tDCS) in the treatment of depression. *Neurophysiologie clinique = Clinical neurophysiology*. 2019;49(1):11-8.
7. Bikson M, Grossman P, Thomas C, Zannou AL, Jiang J, Adnan T, et al. Safety of Transcranial Direct Current Stimulation: Evidence Based Update 2016. *Brain stimulation*. 2016;9(5):641-61.
8. Dobbs B, Pawlak N, Biagioni M, Agarwal S, Shaw M, Piloni G, et al. Generalizing remotely supervised transcranial direct current stimulation (tDCS): feasibility and benefit in Parkinson's disease. *Journal of neuroengineering and rehabilitation*. 2018;15(1):114.
9. Kasschau M, Reiser J, Sherman K, Bikson M, Datta A, Charvet LE. Transcranial Direct Current Stimulation Is Feasible for Remotely Supervised Home Delivery in Multiple Sclerosis. *Neuromodulation : journal of the International Neuromodulation Society*. 2016;19(8):824-31.
10. Nitsche MA, Paulus W. Excitability changes induced in the human motor cortex by weak transcranial direct current stimulation. *The Journal of physiology*. 2000;527(3):633-9.
11. Horvath JC, Forte JD, Carter O. Evidence that transcranial direct current stimulation (tDCS) generates little-to-no reliable neurophysiologic effect beyond MEP amplitude modulation in healthy human subjects: A systematic review. *Neuropsychologia*. 2015;66:213-36.
12. Horvath JC, Forte JD, Carter O. Quantitative Review Finds No Evidence of Cognitive Effects in Healthy Populations From Single-session Transcranial Direct Current Stimulation (tDCS). *Brain Stimul*. 2015;8(3):535-50.
13. Horvath JC, Carter O, Forte JD. No significant effect of transcranial direct current stimulation (tDCS) found on simple motor reaction time comparing 15 different stimulation protocols. *Neuropsychologia*. 2016;91:544-52.
14. Horvath JC, Vogrin SJ, Carter O, Cook MJ, Forte JD. Effects of a common transcranial direct current stimulation (tDCS) protocol on motor evoked potentials found to be highly variable within individuals over 9 testing sessions. *Experimental brain research*. 2016;234(9):2629-42.
15. Héroux ME, Loo CK, Taylor JL, Gandevia SC. Questionable science and reproducibility in electrical brain stimulation research. *PloS one*. 2017;12(4):e0175635.
16. Vannorsdall TD, van Steenburgh JJ, Schretlen DJ, Jayatilake R, Skolasky RL, Gordon B. Reproducibility of tDCS Results in a Randomized Trial: Failure to Replicate Findings of tDCS-Induced Enhancement of Verbal Fluency. *Cognitive and behavioral neurology : official journal of the Society for Behavioral and Cognitive Neurology*. 2016;29(1):11-7.

## tDCS Dosing

17. Koenigs M, Ukueberuwa D, Campion P, Grafman J, Wassermann E. Bilateral frontal transcranial direct current stimulation: failure to replicate classic findings in healthy subjects. *Clinical Neurophysiology*. 2009;120(1):80-4.
18. López-Alonso V, Cheeran B, Río-Rodríguez D, Fernández-del-Olmo M. Inter-individual variability in response to non-invasive brain stimulation paradigms. *Brain stimulation*. 2014;7(3):372-80.
19. López-Alonso V, Fernández-del-Olmo M, Costantini A, Gonzalez-Henriquez JJ, Cheeran B. Intra-individual variability in the response to anodal transcranial direct current stimulation. *Clinical Neurophysiology*. 2015;126(12):2342-7.
20. Wiethoff S, Hamada M, Rothwell JC. Variability in response to transcranial direct current stimulation of the motor cortex. *Brain stimulation*. 2014;7(3):468-75.
21. Chew T, Ho K-A, Loo CK. Inter-and intra-individual variability in response to transcranial direct current stimulation (tDCS) at varying current intensities. *Brain Stimulation*. 2015;8(6):1130-7.
22. Mikkonen M, Laakso I, Sumiya M, Koyama S, Hirata A, Tanaka S. TMS Motor Thresholds Correlate With TDCS Electric Field Strengths in Hand Motor Area. *Frontiers in Neuroscience*. 2018;12(426).
23. Radman T, Ramos RL, Brumberg JC, Bikson M. Role of cortical cell type and morphology in subthreshold and suprathreshold uniform electric field stimulation in vitro. *Brain stimulation*. 2009;2(4):215-28.e2283.
24. Vöröslakos M, Takeuchi Y, Brinyiczki K, Zombori T, Oliva A, Fernández-Ruiz A, et al. Direct effects of transcranial electric stimulation on brain circuits in rats and humans. *Nature communications*. 2018;9(1):483.
25. Mishory A, Molnar C, Koola J, Li X, Kozel FA, Myrick H, et al. The maximum-likelihood strategy for determining transcranial magnetic stimulation motor threshold, using parameter estimation by sequential testing is faster than conventional methods with similar precision. *J Ect*. 2004;20(3):160-5.
26. Merton PA, Hill DK, Morton HB, Marsden CD. Scope of a technique for electrical stimulation of human brain, spinal cord, and muscle. *Lancet*. 1982;2(8298):597-600.
27. Huang Y, Datta A, Bikson M, Parra LC. ROAST: An Open-Source, Fully-Automated, Realistic Volumetric-Approach-Based Simulator For TES. *Conf Proc IEEE Eng Med Biol Soc*. 2018;2018:3072-5.
28. Chhatbar PY, Kautz SA, Takacs I, Rowland NC, Revuelta GJ, George MS, et al. Evidence of transcranial direct current stimulation-generated electric fields at subthalamic level in human brain in vivo. *Brain Stimul*. 2018;11(4):727-33.

# Figure 1



# Figure 2

2A



2B



2C



2D



2E



Figure 3



Figure 4
